# Supplementary material for: A Cell-Based Platform for the Investigation of Immunoproteasome Subunit β5i Expression and Biology of β5i-Containing Proteasomes
Source: MDPI journal article supplement (doi:10.3390/cells10113049), 2021-11-05
Supplement: s1 [file s1]

**Table S1.** Primers used in the study.

| Primer / Oligonucleotide                                  | Sequence 5' – 3'                                                                        | Reference, Position (bp)  |
|-----------------------------------------------------------|-----------------------------------------------------------------------------------------|---------------------------|
| <b>gRNA Cloning into pDG461</b>                           |                                                                                         |                           |
| gRNA_1_olig_top                                           | CACCTGGCTTCCCGGTACTGGTGCAGC                                                             | NC_000006.12: 3691 - 3713 |
| gRNA_1_olig_bottom                                        | AAACGCTGCACCAGTACCGGGAAGCCA                                                             | NC_000006.12: 3691 - 3713 |
| gRNA_2_olig_top                                           | ACCGTCAATAATGGTGGTGGTGGCAGCGT                                                           | NC_000006.12: 3971 - 3995 |
| gRNA_2_olig_bottom                                        | TAAAACGCTGCCACCACCACCATTATTGA                                                           | NC_000006.12: 3971 - 3995 |
| <b>Donor fragment cloning into pcDNA3.1(-) and pAL-2T</b> |                                                                                         |                           |
| Left_HA_fwd                                               | GGGAGACCCAAGCTGGCAGAGTCAGAA<br>GAAGGGCAT                                                | NC_000006.12: 3488 - 3507 |
| Left_HA_rev                                               | TGGCTTCCCGGTACTGGTGCAGCAGATCAC<br>TGACATCTG                                             | NC_000006.12: 3675 - 3713 |
| Adapter_1_top                                             | GTAGAAAGTACAGATGTCAGTGATCTGCT<br>GCACCAGTACCGGGAAGCCAATCAAGGAT<br>CCGGAGGTGGAGGTTTCAGGA | -                         |
| Adapter_1_bottom                                          | TCCTGAACCTCCACCTCCGGATCCTTGATTG<br>GCTTCCCGGTACTGGTGCAGCAGATCACTGACAT<br>CTGTACTTTCTAC  | -                         |
| Insert_fwd                                                | AGTACCGGGAAGCCAATCAAGGATCC<br>GGAGGTGGAGGTTTCAGG                                        | -                         |
| Insert_rev_mCherry                                        | CTGCCAAGCTGCCACCACCACCATTA<br>CTTGACAGCTCGTCCATGC                                       | -                         |
| Adapter_2_top_mCherry                                     | GCATGGACGAGCTGTACAAGTAATGGTG<br>GTGGTGGCAGCTTGGCAGGTCTCC<br>TCTGGGAGGTCTTG              | -                         |
| Adapter_2_bottom_mCherry                                  | CAAGACCTCCAGAGGAGACCTGCCAAGC<br>TGCCACCACCACCATTACTTGTACA<br>GCTCGTCCATGC               | -                         |
| Right_HA_fwd                                              | TGGTGGTGGTGGCAGCTTGGCAG<br>GTCTCCTCTGGGAGGT                                             | NC_000006.12: 3978 - 4010 |
| Right_HA_rev                                              | CGAGTCTAGAGGGCCCGTTTAAACGCCGTT<br>TTTCTTTATTCTACTTAGTGGG                                | NC_000006.12: 4184 - 4210 |
| <b>Control and Sequencing</b>                             |                                                                                         |                           |
| Genome control_fwd<br>(Primer A)                          | CCATGTTACCAACATCTTCCTCTCC                                                               | NC_000006.12: 3146 - 3171 |
| Control_mCherry_rev<br>(Primer B)                         | CACCCTTGGTCACCTTCAGCTTGGC                                                               | -                         |
| Cherry_control_fwd<br>(Primer C)                          | GCCACTACGACGCTGAGGTCAAGACC                                                              | -                         |
| Rev_control<br>(Primer D)                                 | GCCCCACCCAACAACCACAGGC                                                                  | NG_028165.1: 9269-9248    |
| Transcript_seq_fwd<br>(Primer E)                          | CCTGTTTCCAAGACTCTGCC                                                                    | NM_004159.5: 211-230      |

|                                  |                         |                        |
|----------------------------------|-------------------------|------------------------|
| Transcript_seq_rev<br>(Primer F) | TCCTCTGGCTGCTGAGCC      | NM_004159.5: 1220-1203 |
| qPCR_transgene_fwd<br>(Primer G) | GAAGGAAGATGGTTGGGTGAAAG | NM_004159.5: 1007-1029 |
| qPCR_transgene_rev<br>(Primer H) | ACCTTGAAGCGCATGAACTCC   | -                      |
| Exon6_control_fwd                | GGTGAACAAGGTGATTGAG     | NM_148919.3: 349-367   |
| Control_RNA_mCherry_rev          | GTACAGCTCGTCCATGCCG     | -                      |
| SG_primer                        | TTTGTCTGCAGAATTGGC      | -                      |
| SK_primer                        | TCTAGAACTAGTGGATC       | -                      |
| M13_fwd                          | GTAAAACGACGGCCAGT       | -                      |
| M13_rev                          | CAGGAAACAGCTATGAC       | -                      |
