# Supplementary material for: A Cell-Based Platform for the Investigation of Immunoproteasome Subunit β5i Expression and Biology of β5i-Containing Proteasomes
Source: MDPI journal article supplement (doi:10.3390/cells10113049), 2021-11-05
Supplement: s1 [file s1]

a

gRNA\_1

| Bulge Type | Target                                                                 | Chromosome | Position | Direction | Mismatches | Bulge Size |
|------------|------------------------------------------------------------------------|------------|----------|-----------|------------|------------|
| X          | crRNA: TGGCTTCCCGGTACTGGTGCAGCNGG<br>DNA: TGGCTTCCCGGTACTGGTGCAGCAGG   | chr6       | 32840966 | +         | 0          | 0          |
| DNA        | crRNA: T-GGCTTCCCGGTACTGGTGCAGCNGG<br>DNA: TTGGCTTCCCGGTACTGGTGCAGCAGG | chr6       | 32840965 | +         | 0          | 1          |
| DNA        | crRNA: TG-GCTTCCCGGTACTGGTGCAGCNGG<br>DNA: TtGGCTTCCCGGTACTGGTGCAGCAGG | chr6       | 32840965 | +         | 1          | 1          |
| DNA        | crRNA: TGG-CTTCCCGGTACTGGTGCAGCNGG<br>DNA: TtGGCTTCCCGGTACTGGTGCAGCAGG | chr6       | 32840965 | +         | 1          | 1          |
| DNA        | crRNA: TGGC-TTCCCGGTACTGGTGCAGCNGG<br>DNA: TtGGCTTCCCGGTACTGGTGCAGCAGG | chr6       | 32840965 | +         | 2          | 1          |
| RNA        | crRNA: TGGCTTCCCGGTACTGGTGCAGCNGG<br>DNA: g-GCTTCCCGGTACTGGTGCAGCAGG   | chr6       | 32840967 | +         | 1          | 1          |
| RNA        | crRNA: TGGCTTCCCGGTACTGGTGCAGCNGG<br>DNA: gG-CTTCCCGGTACTGGTGCAGCAGG   | chr6       | 32840967 | +         | 1          | 1          |
| RNA        | crRNA: TGGCTTCCCGGTACTGGTGCAGCNGG<br>DNA: gGc-TTCCCGGTACTGGTGCAGCAGG   | chr6       | 32840967 | +         | 2          | 1          |

gRNA\_2

| Bulge Type | Target                                                                   | Chromosome | Position | Direction | Mismatches | Bulge Size |
|------------|--------------------------------------------------------------------------|------------|----------|-----------|------------|------------|
| RNA        | crRNA: TCAATAATGGTGGTGGTGCAGCGTNGG<br>DNA: TCAATAATGGTGGTGGTGCAGC-gCTGGG | chr6       | 32840938 | -         | 2          | 1          |
| RNA        | crRNA: TCAATAATGGTGGTGGTGCAGCGTNGG<br>DNA: TCAATAATGGTGGTGGTGCAG-cTGGG   | chr6       | 32840938 | -         | 1          | 1          |
| RNA        | crRNA: TCAATAATGGTGGTGGTGCAGCGTNGG<br>DNA: TCAATAATGGTGGTGGTGCAGC-TGGG   | chr6       | 32840938 | -         | 0          | 1          |

b

gRNA\_1

| Result                                              | Query type              | Mismatch | Hit ends in RG | chr position             | Strand | Cut site  | Score |
|-----------------------------------------------------|-------------------------|----------|----------------|--------------------------|--------|-----------|-------|
| TGGCTTCCCGGTACTGGTGCAGCAGG -- hit<br>N -- query     | No indel                | 0        | Yes            | Chr6:32840967-32840992   | +      | 32840986  | 0     |
| TGGCTTCCCGGTACTGGTGCAGCAGG -- hit<br>T C T -- query | No indel                | 3        | Yes            | Chr1:114152590-114152615 | +      | 114152609 | 0.71  |
| TGGCTTCCCGGTACTGGTGCAGCAGG -- hit<br>T -- query     | Del 23                  | 0        | Yes            | Chr6:32840968-32840992   | +      | 32840986  | 0.61  |
| TGGCTTCCCGGTACTGGTGCAGCAGG -- hit<br>T -- query     | Del 21, or Del 22       | 1        | Yes            | Chr6:32840968-32840992   | +      | 32840986  | 0.71  |
| TGGCTTCCCGGTACTGGTGCAGCAGG -- hit<br>T -- query     | Del 20                  | 2        | Yes            | Chr6:32840968-32840992   | +      | 32840986  | 0.83  |
| TGGCTTCCCGGTACTGGTGCAGCAGG -- hit<br>GNG -- query   | Del 2                   | 2        | Yes            | Chr6:32840967-32840991   | +      | 32840985  | 31.51 |
| TGGCTTCCCGGTACTGGTGCAGCAGG -- hit<br>NG -- query    | Del 1                   | 1        | Yes            | Chr6:32840967-32840991   | +      | 32840985  | 26.51 |
| TGGCTTCCCGGTACTGGTGCAGCAGG -- hit<br>NG -- query    | Del PAM 3               | 1        | Yes            | Chr6:32840967-32840991   | +      | 32840985  | 40.51 |
| TGGCTTCCCGGTACTGGTGCAGCAGG -- hit<br>NG -- query    | Del PAM 1, or Del PAM 2 | 0        | Yes            | Chr6:32840967-32840991   | +      | 32840985  | 20.51 |
| TGGCTTCCCGGTACTGGTGCAGCAGG -- hit<br>NG -- query    | Del PAM 3               | 1        | Yes            | Chr6:32840967-32840991   | +      | 32840985  | 40.51 |
| TGGCTTCCCGGTACTGGTGCAGCAGG -- hit<br>NG -- query    | Del PAM 1, or Del PAM 2 | 0        | Yes            | Chr6:32840967-32840991   | +      | 32840985  | 20.51 |
| TGGCTTCCCGGTACTGGTGCAGCAGG -- hit<br>N -- query     | Ins 22                  | 0        | Yes            | Chr6:32840966-32840992   | +      | 32840986  | 0.8   |
| TGGCTTCCCGGTACTGGTGCAGCAGG -- hit<br>N -- query     | Ins 21                  | 1        | Yes            | Chr6:32840966-32840992   | +      | 32840986  | 0.9   |
| TGGCTTCCCGGTACTGGTGCAGCAGG -- hit<br>N -- query     | Ins 20                  | 1        | Yes            | Chr6:32840966-32840992   | +      | 32840986  | 0.92  |
| TGGCTTCCCGGTACTGGTGCAGCAGG -- hit<br>N -- query     | Ins 19                  | 2        | Yes            | Chr6:32840966-32840992   | +      | 32840986  | 1.05  |
| TGGCTTCCCGGTACTGGTGCAGCAGG -- hit<br>N -- query     | Ins 1                   | 2        | No             | Chr6:32840967-32840993   | +      | 32840987  | 32.7  |
| TGGCTTCCCGGTACTGGTGCAGCAGG -- hit<br>N -- query     | Ins PAM 2, or Ins PAM 3 | 1        | No             | Chr6:32840967-32840993   | +      | 32840987  | 40.7  |
| TGGCTTCCCGGTACTGGTGCAGCAGG -- hit<br>N -- query     | Ins PAM 1               | 1        | No             | Chr6:32840967-32840993   | +      | 32840987  | 40.7  |

gRNA\_2

| Result                                               | Query type              | Mismatch | Hit ends in RG | chr position           | Strand | Cut site | Score |
|------------------------------------------------------|-------------------------|----------|----------------|------------------------|--------|----------|-------|
| TCAATAATGGTGGTGGTGCAGCGTNGG -- hit<br>GTN G -- query | No indel                | 3        | No             | Chr6:32840938-32840965 | -      | 32840944 | 31    |
| TCAATAATGGTGGTGGTGCAGCGTNGG -- hit<br>GG N -- query  | Del 4                   | 2        | Yes            | Chr6:32840939-32840965 | -      | 32840945 | 12.51 |
| TCAATAATGGTGGTGGTGCAGCGTNGG -- hit<br>GG N -- query  | Del 3                   | 1        | Yes            | Chr6:32840939-32840965 | -      | 32840945 | 9.51  |
| TCAATAATGGTGGTGGTGCAGCGTNGG -- hit<br>G N -- query   | Del 2                   | 0        | Yes            | Chr6:32840939-32840965 | -      | 32840945 | 5.51  |
| TCAATAATGGTGGTGGTGCAGCGTNGG -- hit<br>G N -- query   | Del 1                   | 1        | Yes            | Chr6:32840939-32840965 | -      | 32840945 | 11.51 |
| TCAATAATGGTGGTGGTGCAGCGTNGG -- hit<br>GTN -- query   | Del PAM 3               | 2        | Yes            | Chr6:32840939-32840965 | -      | 32840945 | 31.51 |
| TCAATAATGGTGGTGGTGCAGCGTNGG -- hit<br>GTN -- query   | Del PAM 1, or Del PAM 2 | 2        | Yes            | Chr6:32840939-32840965 | -      | 32840945 | 31.51 |

**Supplementary Figure S1.** gRNA design and identification of putative off target cleavage sites. **(a)** Identification of possible gRNA off target sites with COSMID (<https://crispr.bme.gatech.edu/>) and **(b)** Cas-OFFinder software (<http://www.rgenome.net/cas-offinder/>).

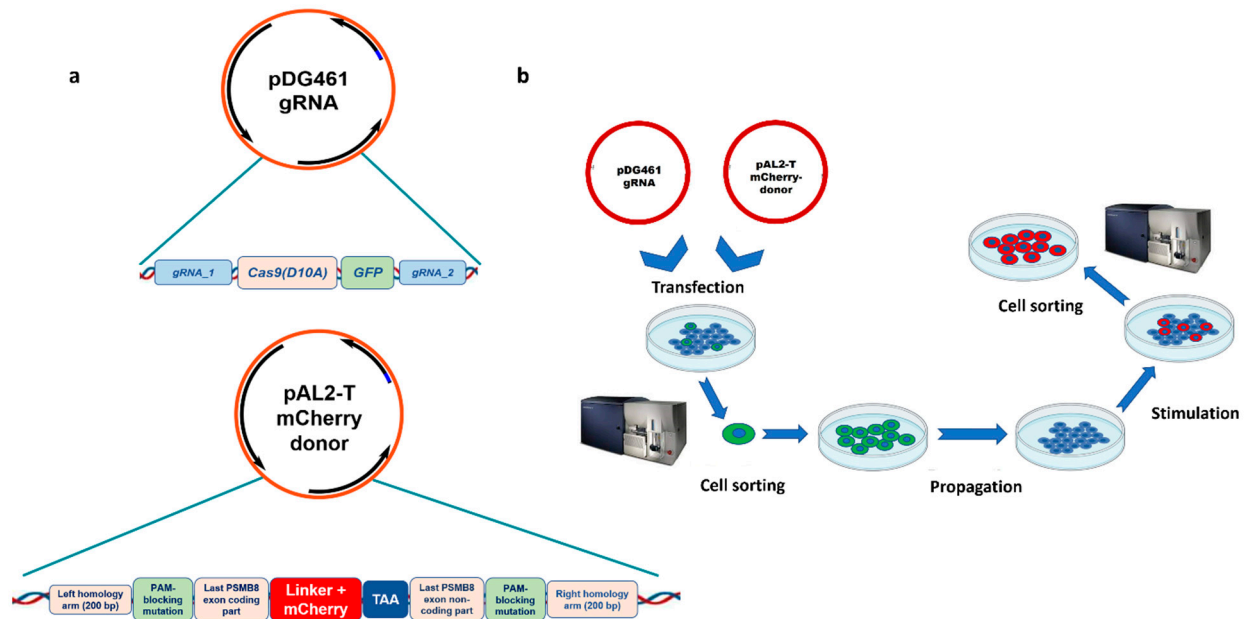

**Supplementary Figure S2.** Vector design and experimental pipeline. **(a)** Schematic representation of pDG461gRNA and pAL-2TmCherrydonor plasmids. The obtained pDG461gRNA vector encodes the Cas9D10A mutant endonuclease, green fluorescent protein (GFP) and contains sequences of two gRNAs designed to introduce 2 nicks on the sides of the *PSMB8* stop codon at a distance of 41 bp from each other. The commercial vector pAL-2T was used as a backbone for pAL-2TmCherrydonor plasmid. Gibson assembly method was used to obtain an insert composed of 5' homology arm, fragment of the *PSMB8* gene, Ser-Gly linker encoding sequence, *mCherry* and the 3' homology arm. **(b)** Schematic representation of experiments performed with U937, SW620, TZM-bl and HepG2 cells during genome editing, selection and enrichment of cellular population with modified genome. Cell lines were co-transfected with obtained plasmids. Forty-eight h post transfection cell sorting was performed and cells with high GFP expression were obtained. After two weeks of subsequent cell propagation GFP fluorescence was significantly reduced, and cells were incubated with 1000 U/mL of IFN- $\gamma$  and 500 U/mL of TNF- $\alpha$  for 72 h and analyzed for mCherry fluorescence. Cells were sorted again to enrich the population of cells with mCherry fluorescence.

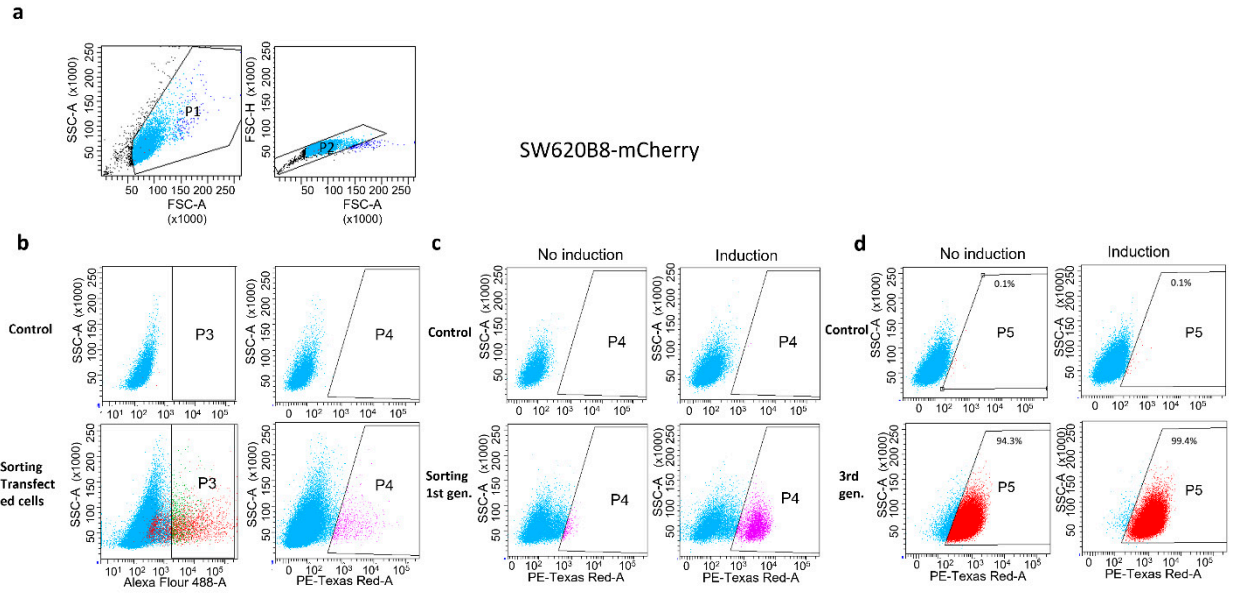

**Supplementary Figure S3.** Gating strategy for the sorting of SW620B8-mCherry cells. **(a)** FSC vs SSC gating to exclude dead cells and cell debris, FSC area vs height gating to exclude cell doublets. **(b)** After transfection, GFP+ (gate P3) and mCherry+ (gate P4) cell population was isolated by FACS. **(c)** mCherry+ SW620 cells were sorted after induction with 1000 U/mL of IFN- $\gamma$  and 500 U/mL of TNF- $\alpha$  for 72 h by FACS (gate P4). **(d)** The percentage of mCherry+ cells (gate P5) after 3 rounds of propagation, induction, and sorting. Control – wild-type cells.

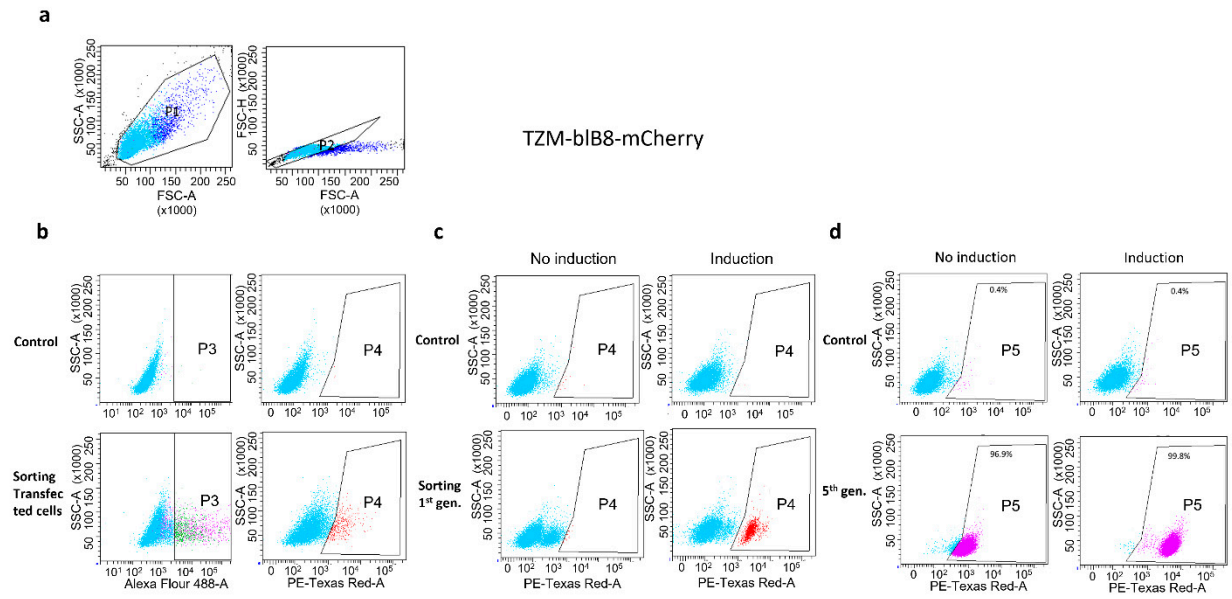

**Supplementary Figure S4.** Gating strategy for the sorting of TZM-blB8-mCherry cells. **(a)** FSC vs SSC gating to exclude dead cells and cell debris, FSC area vs height gating to exclude cell doublets. **(b)** After transfection, GFP+ (gate P3) and mCherry+ (gate P4) cell population was isolated by FACS. **(c)** mCherry+ TZM-bl cells were sorted after induction with 1000 U/mL of IFN- $\gamma$  and 500 U/mL of TNF- $\alpha$  for 72 h by FACS (gate P4). **(d)** The percentage of mCherry+ cells (gate P5) after 5 rounds of propagation, induction, and sorting. Control – wild-type cells.

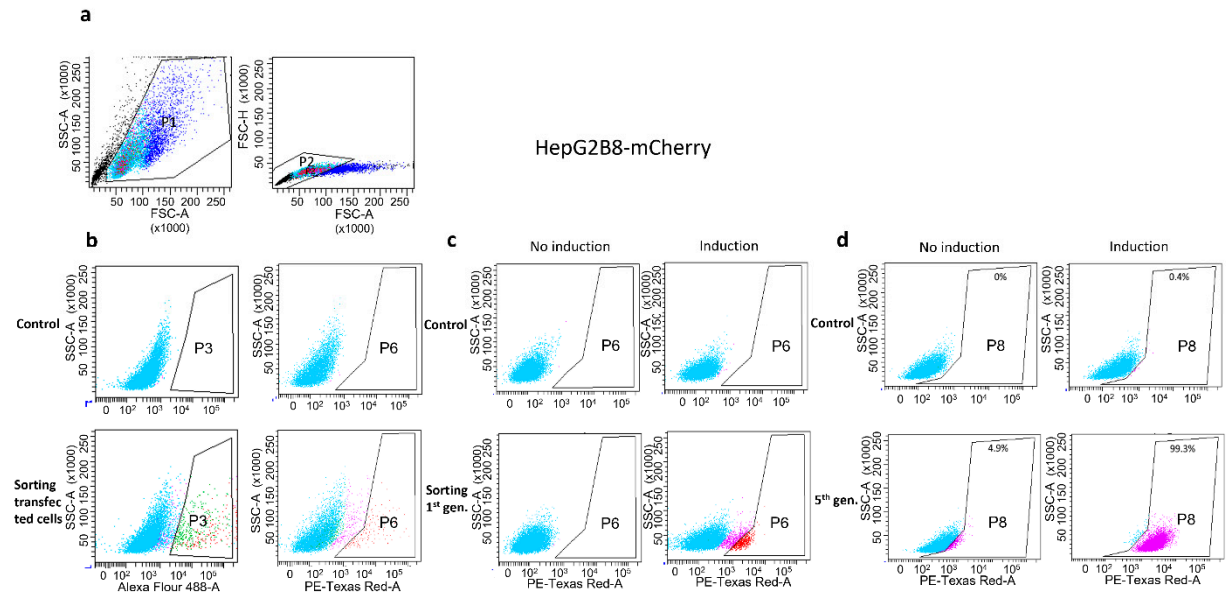

**Supplementary Figure S5.** Gating strategy for the sorting of HepG2B8-mCherry cells. **(a)** FSC vs SSC gating to exclude dead cells and cell debris, FSC area vs height gating to exclude cell doublets. **(b)** After transfection, GFP+ (gate P3) and mCherry+ (gate P4) cell population was isolated by FACS. **(c)** mCherry+ HepG2 cells were sorted after induction with 1000 U/mL of IFN- $\gamma$  and 500 U/mL of TNF- $\alpha$  for 72 h by FACS (gate P4). **(d)** The percentage of mCherry+ cells (gate P5) after 5 rounds of propagation, induction, and sorting. Control – wild-type cells.

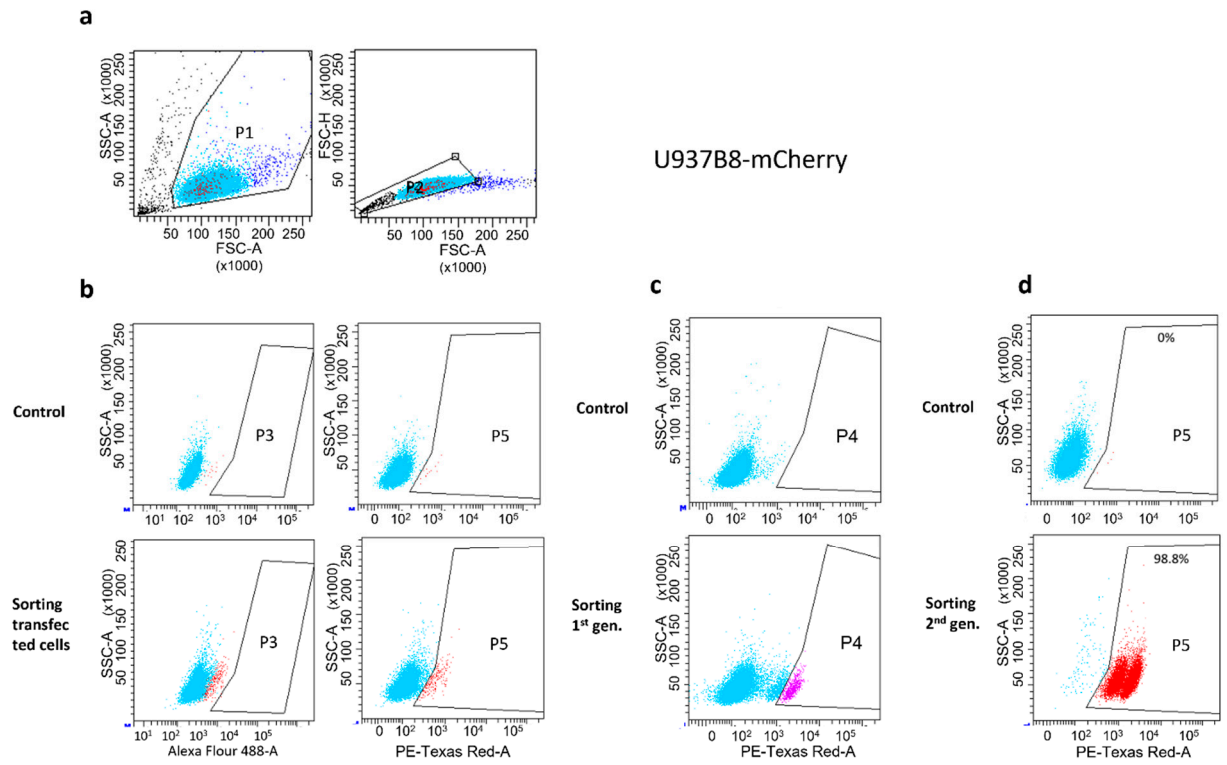

**Supplementary Figure S6.** Gating strategy for the sorting of U937B8-mCherry cells. **(a)** FSC vs SSC gating to exclude dead cells and cell debris, FSC area vs height gating to exclude cell doublets. **(b)** After transfection, GFP+ (gate P3) and mCherry+ (gate P4) cell population was isolated by FACS. **(c)** mCherry+ U937 cells were sorted after induction with 1000 U/mL of IFN- $\gamma$  and 500 U/mL of TNF- $\alpha$  for 72 h by FACS (gate P4). **(d)** The percentage of mCherry+ cells (gate P5) after 2 rounds of propagation, induction, and sorting. Control – wild-type cells.



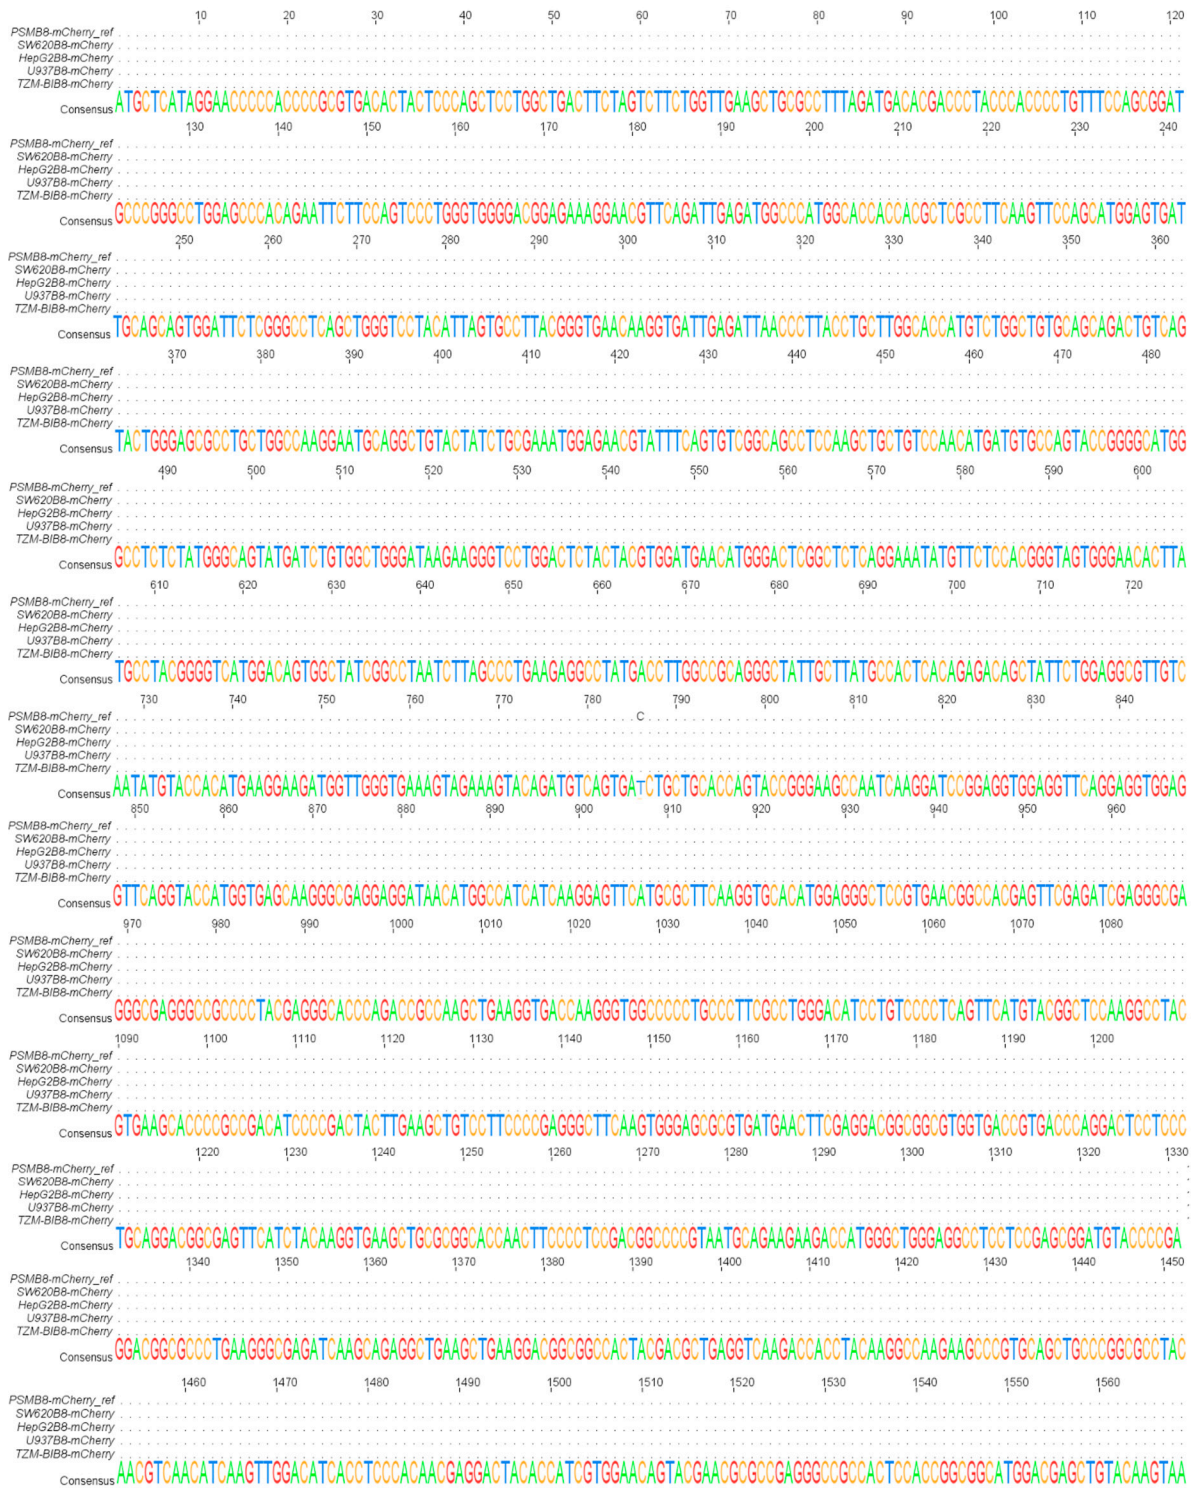

**Supplementary Figure S7.** Multiple alignment of PSMB8-mCherry chimera transcript sequences from the obtained cell lines. Multiple alignment of PSMB8-mCherry chimera transcript sequences amplified from U937B8-mCherry, SW620B8-mCherry, T2M-b1B8mCherry and HepG2B8mCherry cells. *PSMB8* transcript sequence NM\_004159.5 was used as a reference.

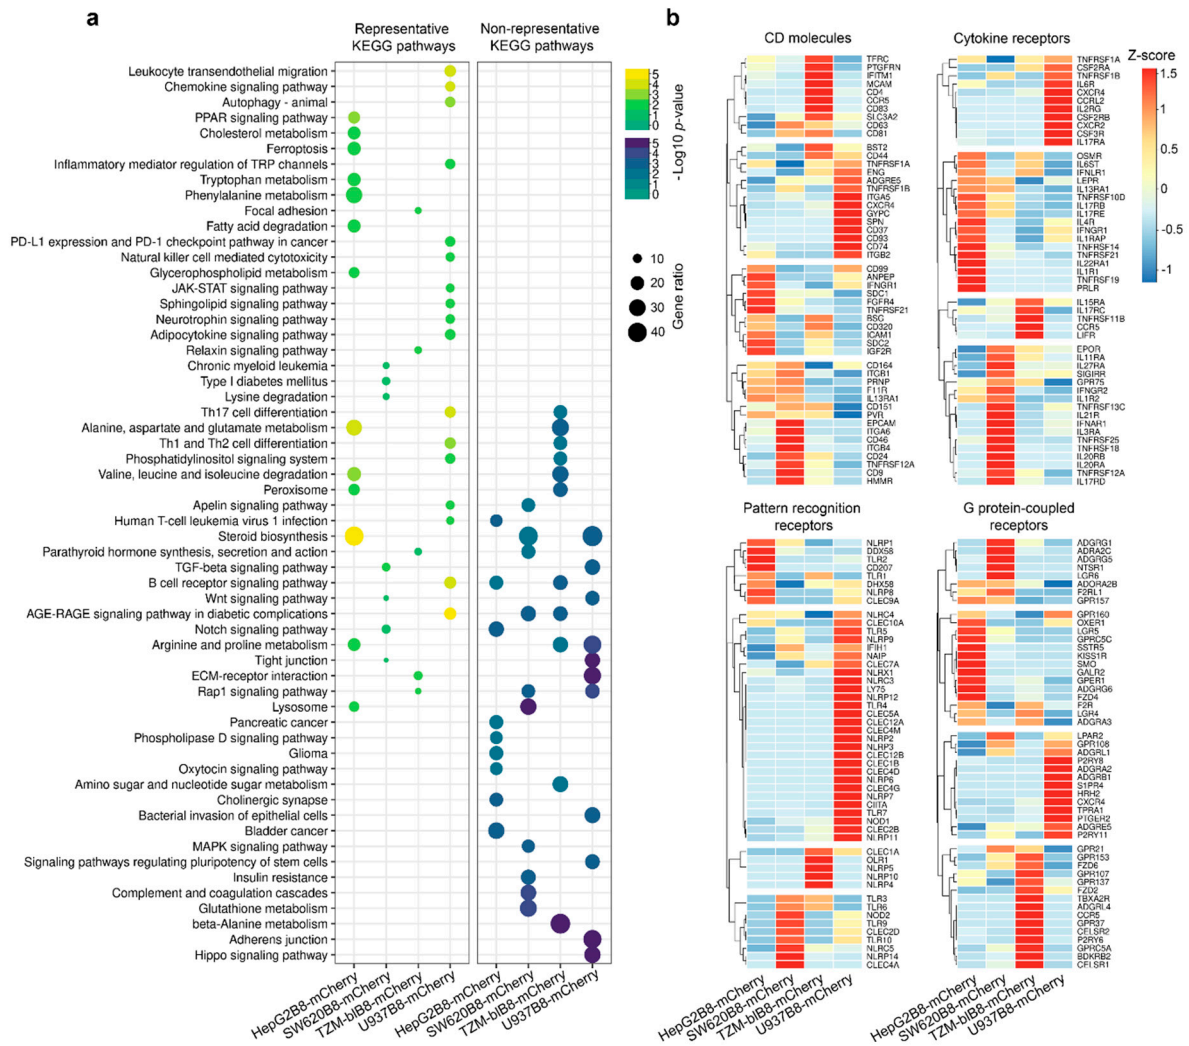

**Supplementary Figure S8.** Comparative functional analysis of knock-in cells. **(a)** Gene set enrichment analysis (GSEA) in the KEGG database depicting representative and non-representative pathways in each cell type. Only genes that show not less than the 2-fold difference (higher for representative; lower for non-representative pathways) in expression level (reads per kilobase per million mapped reads, RPKM) in one cell type in comparison to the average expression level in all cell types were used for enrichment analysis. Only gene expression values in mCherry knock-in cells were used in this analysis. P-values for enrichment analysis are shown using different color keys for representative and non-representative pathways. Gene ratio shows the percentage of representative or non-representative genes from the overall number of genes in the pathway. **(b)** Heatmaps demonstrating expression levels of top 50 receptors based on expression values from different protein families. Expression values (RPKM) are Z-transformed.



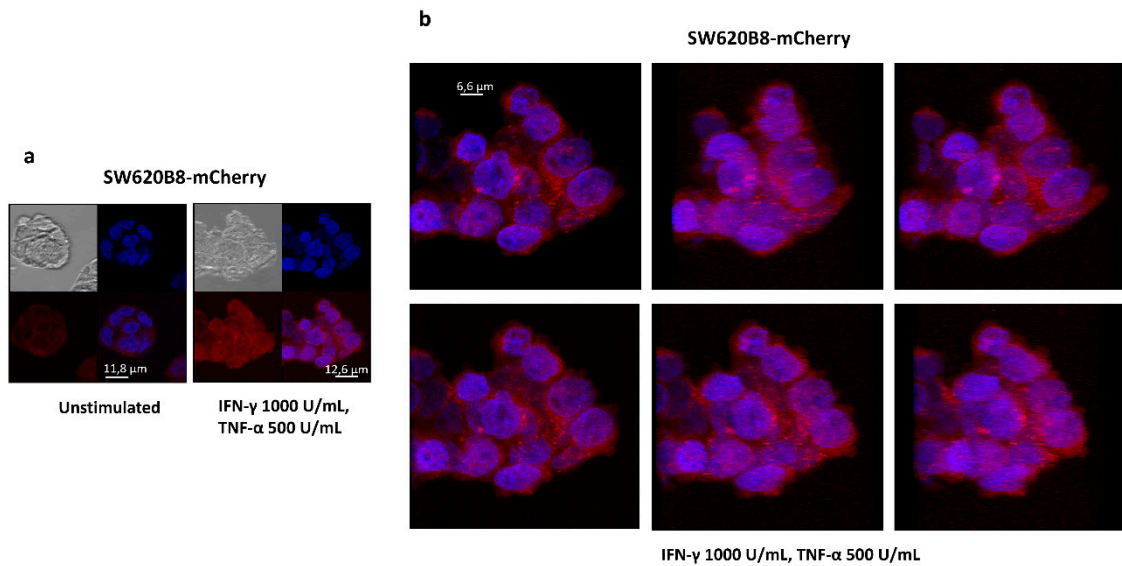

**Supplementary Figure S9.** Confocal microscopy of the unstimulated and SW620B8-mCherry cells treated with 1000 U/mL IFN- $\gamma$  and 500 U/mL of TNF- $\alpha$ . **(a)** Confocal microscopy of the unstimulated and SW620B8-mCherry cells treated with 1000 U/mL IFN- $\gamma$  and 500 U/mL of TNF- $\alpha$ . **(b)** Images of stimulated cells shown in **a** under different angles.

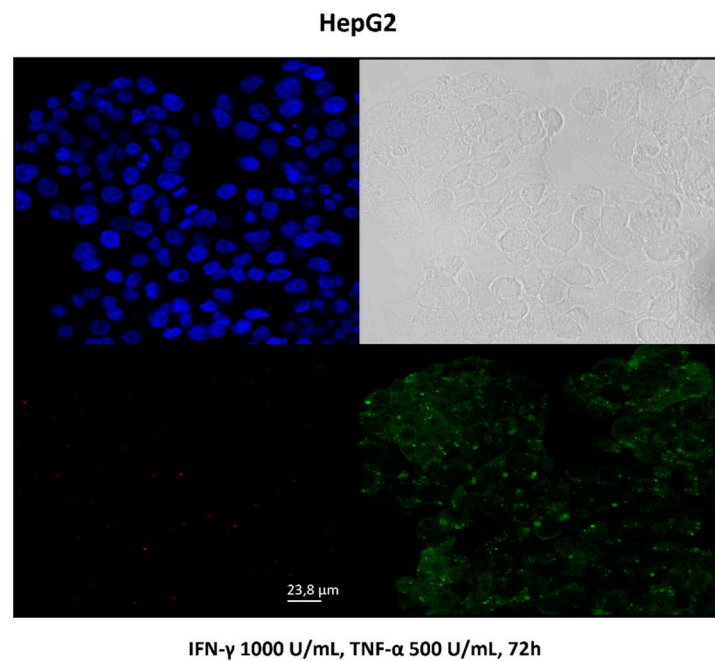

**Supplementary Figure S10.** Confocal microscopy of the HepG2 cells stimulated with IFN- $\gamma$  (1000 U/mL) and TNF- $\alpha$  (500 U/mL).

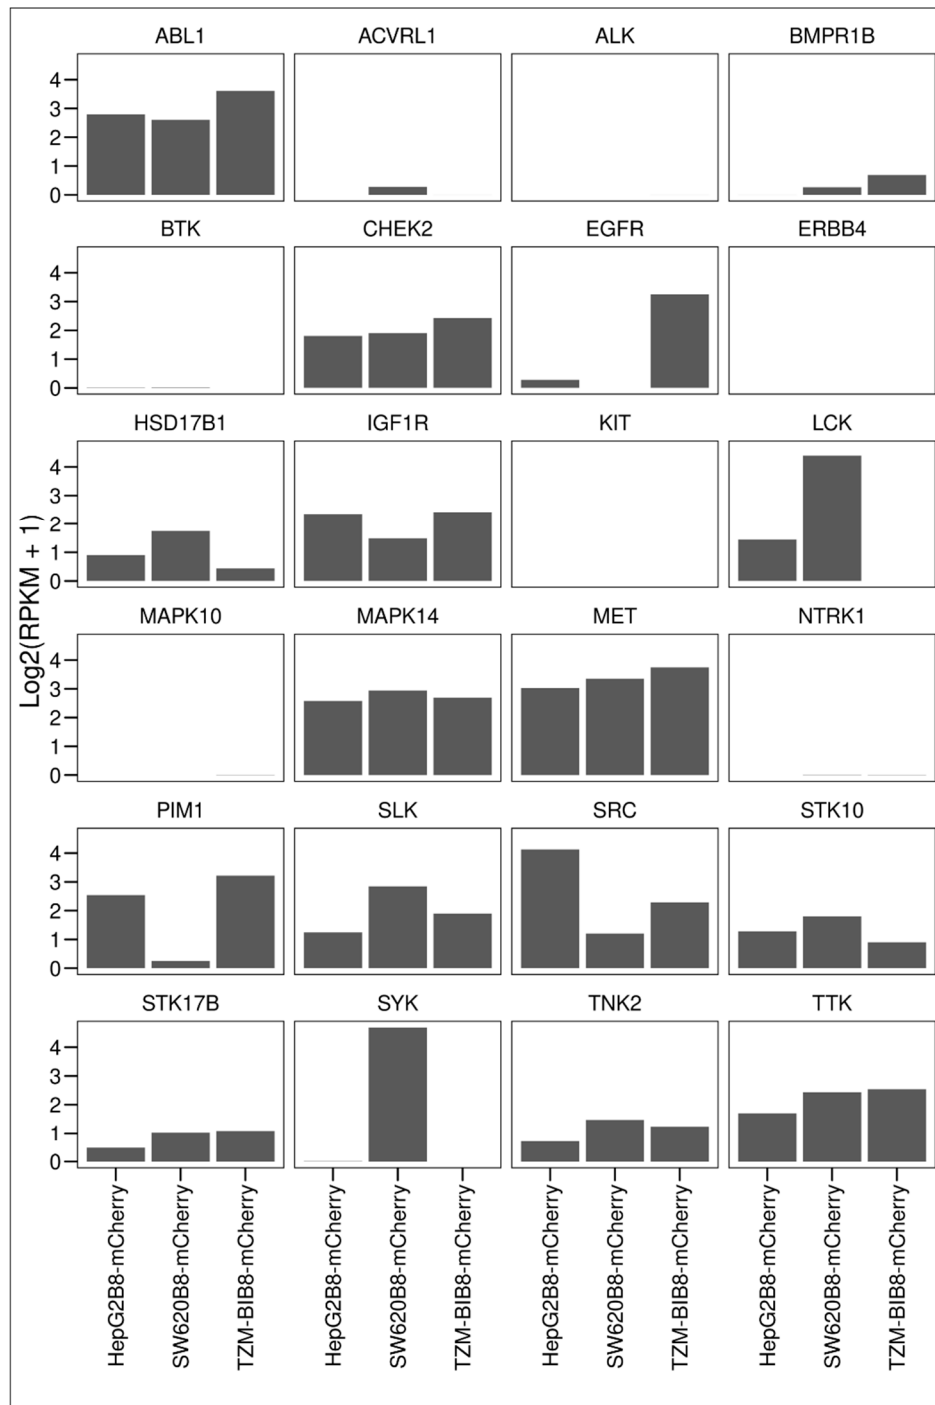

**Supplementary Figure S11.** The expression of EGFR gene and 23 Gefitinib off target genes in the modified cells.
